# Supplementary material for: Probing the photovoltaic properties of Ga-doped CdS–Cu2S core–shell heterostructured nanowire devices
Source: Royal Society of Chemistry journal article supplement (doi:10.1039/c8cc10316j), 2019-01-01
Supplement: c8cc10316j1.pdf [file c8cc10316j1.pdf]

## Supporting Information

### Probing the Photovoltaic Properties of Ga-Doped CdS–Cu<sub>2</sub>S

#### Core–Shell Heterostructured Nanowire Devices

Ming-Yen Lu<sup>a, b, \*</sup>, Meng-Hsiang Hong<sup>c</sup>, Yen-Min Ruan<sup>c</sup>, and Ming-Pei Lu<sup>d</sup>

<sup>a</sup> Department of Materials Science and Engineering, National Tsing Hua University, Hsinchu 300, Taiwan

<sup>b</sup> High Entropy Materials Center, National Tsing Hua University, Hsinchu 300, Taiwan

<sup>c</sup> Graduate Institute of Opto-Mechatronics, National Chung Cheng University, Chia-Yi 62102, Taiwan

<sup>d</sup> National Nano Device Laboratories, Hsinchu 300, Taiwan

\* Corresponding Author: mylu@mx.nthu.edu.tw

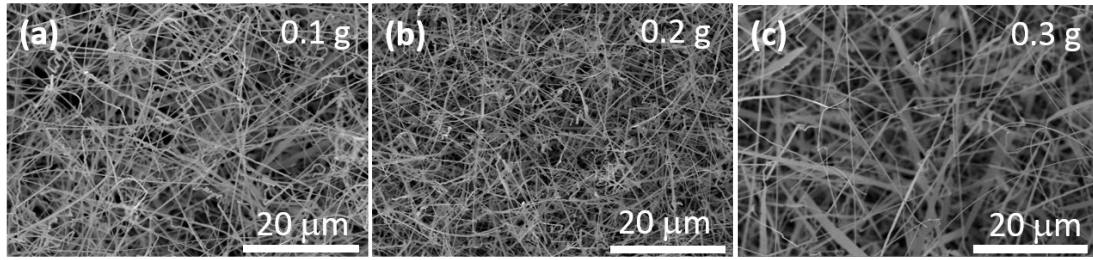

**Figure S1** SEM images of CdS NWs grown using (a) 0.1, (b) 0.2, and (c) 0.3 g of the Ga source.

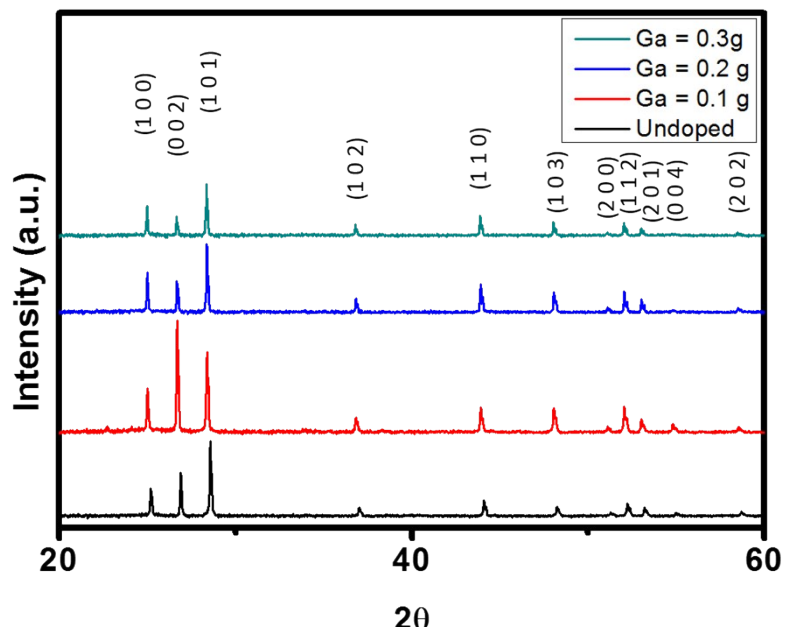

**Figure S2** XRD patterns of the various samples.

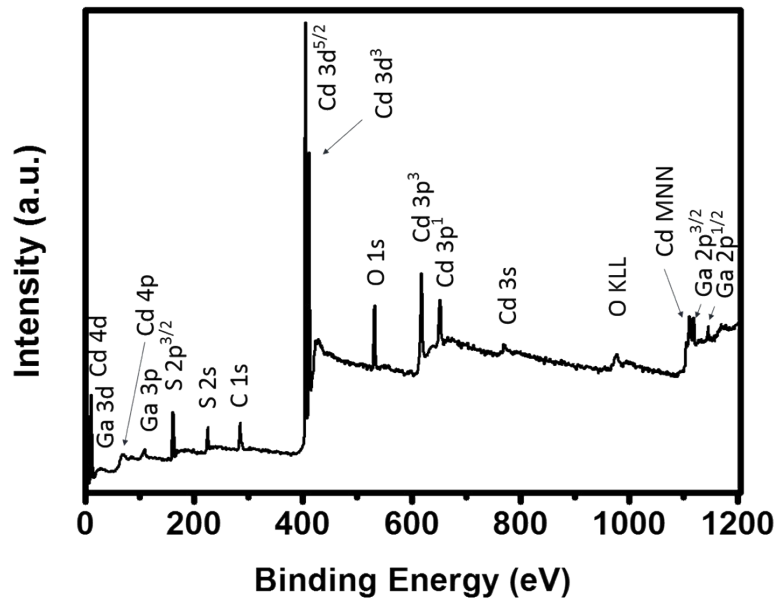

**Figure S3** XPS survey scan of the Ga-doped CdS NWs.

- **Fabrication of heterostructured devices**

First, a Ga-doped NW was dispersed on a pre-patterned 300-nm SiO<sub>2</sub>/Si substrate [Fig. S4(a)]; after EBL and a lift-off process, 120-nm Ti and 30-nm Au were deposited as the electrode on one side of the CdS NW [Fig. S4(b)]. The NW was then immersed in 5 M CuCl in MeOH at 50 °C for 10 s to form a Cu<sub>2</sub>S shell on the CdS NW, through cation exchange [Fig. S4(c)]; the heterostructured NW device was obtained after deposition of a 120-nm Ni/30-nm Au electrode on the Cu<sub>2</sub>S shell [Fig. S4(d)]. Ti and Ni served as contact metals for the CdS and Cu<sub>2</sub>S, respectively, forming ohmic contacts at the interfaces.

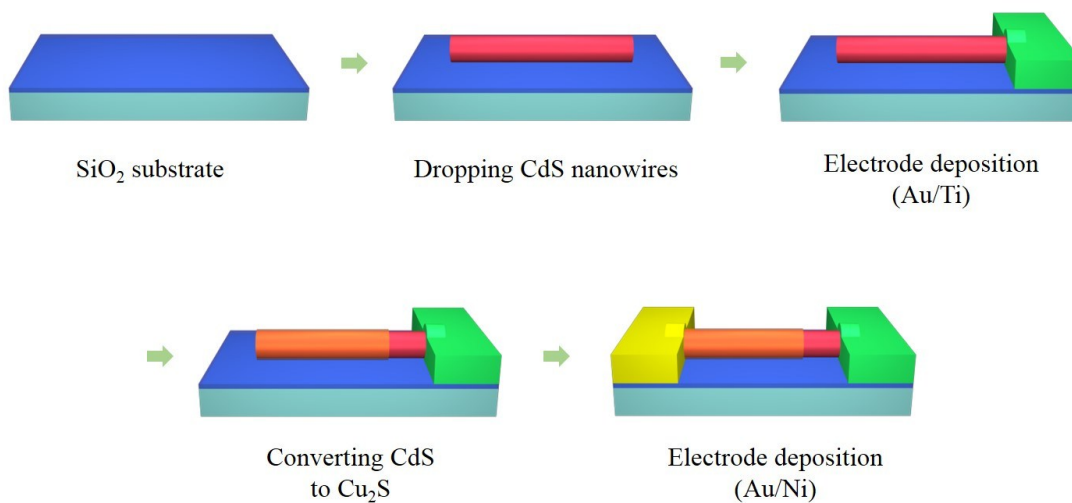

**Figure S4** Schematic representation of the fabrication process flow of a CdS–Cu<sub>2</sub>S core–shell heterostructure device.

- **The definitions of fill factor (FF) and the power conversion efficiency ( $\eta$ )**

The FF and the power conversion efficiency ( $\eta$ ) are crucial parameters for gauging the performance of any solar cell; they are defined as,

$$\text{FF} = \frac{J_m \times V_m}{J_{sc} \times V_{oc}} \quad (1)$$

and

$$\eta = \frac{J_{sc} \times V_{oc} \times \text{FF}}{P_{in}} \quad (2)$$

where  $J_m$  and  $V_m$  are the current density and voltage, respectively, measured when the output power of the device was at its maximum value, and  $P_{in}$  is the power density of the incident light.
